# Supplementary material
Source: MDPI journal article supplement (https://www.mdpi.com/2079-6412/11/11/1352)
Supplement: s1 [file s1]

# Supplementary Materials: Investigating the Nucleation of AlO<sub>x</sub> and HfO<sub>x</sub> ALD on Polyimide: Influence of Plasma Activation

Laura Astoreca <sup>1,2,\*</sup>, David Schaubroeck <sup>1</sup>, Parinaz Saadat Esbah Tabaei <sup>2</sup>, Rouba Ghobeira <sup>2</sup>, Maaïke Op de Beeck <sup>1</sup>, Rino Morent <sup>2</sup>, Herbert De Smet <sup>1</sup> and Nathalie De Geyter <sup>2</sup>

<sup>1</sup> Centre for Microsystems Technology (CMST), imec and Ghent University, Technologiepark-Zwijnaarde 126, 9052 Ghent, Belgium; David.Schaubroeck@UGent.be (D.S.); Maaïke.OpdeBeeck@imec.be (M.O.d.B.); herbert.desmet@ugent.be (H.D.S.)

<sup>2</sup> Research Unit Plasma Technology (RUPT), Department of Applied Physics, Faculty of Engineering and Architecture, Ghent University, Sint-Pietersnieuwstraat 41, B4, 9000 Ghent, Belgium; ParinazSaadat.EsbahTabaei@Ugent.be (P.S.E.T.); Rouba.Ghobeira@Ugent.be (R.G.); Rino.Morent@Ugent.be (R.M.); Nathalie.DeGeyter@Ugent.be (N.D.G.)

\* Correspondence: laura.astorecaalvarez@ugent.be

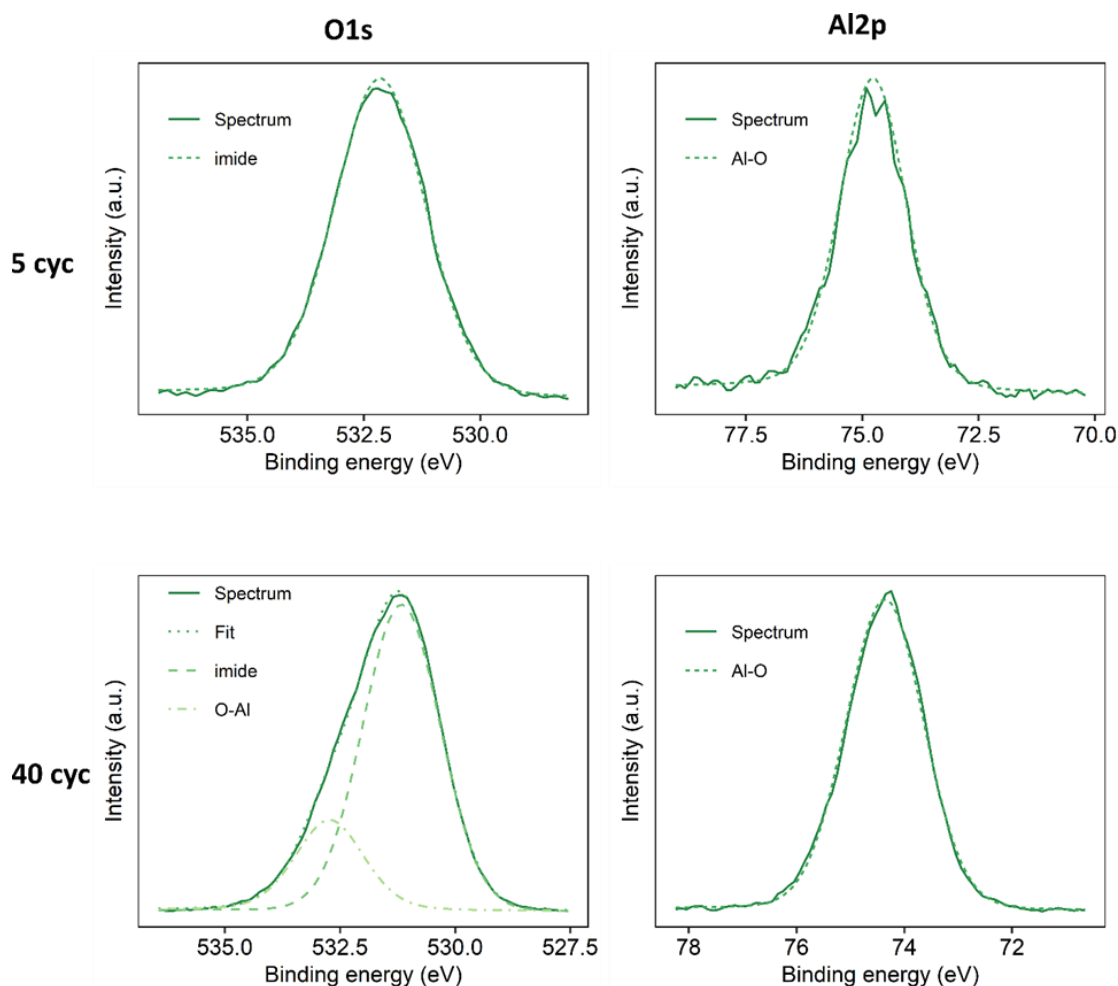

**Figure S1.** Peak fitting of O1s and Al2p high resolution spectra after 5 and 40 ALD cycles of Al<sub>2</sub>O<sub>3</sub> on polyimide.

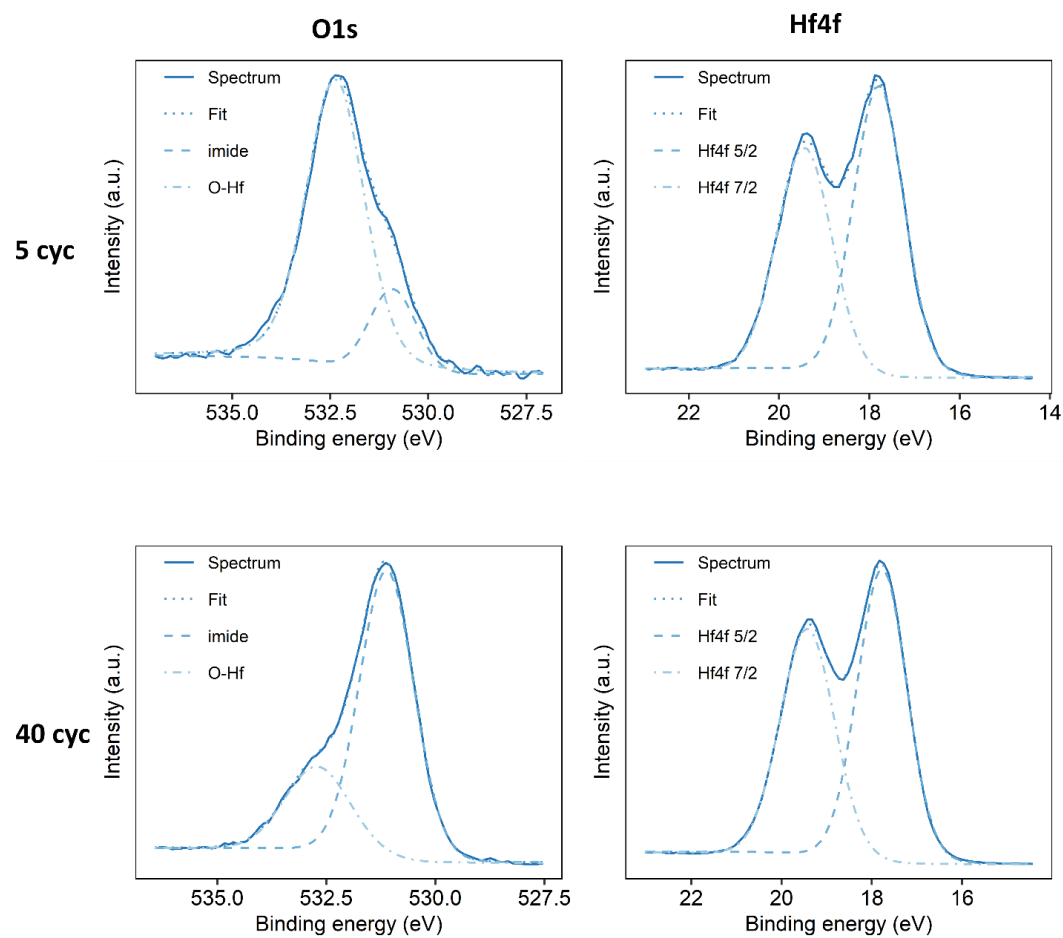

**Figure S2.** Peak fitting of O1s and Hf4f high resolution spectra after 5 and 40 ALD cycles of HfO<sub>2</sub> on polyimide.
